# Supplementary material for: Enhanced oxygen evolution catalytic activity of NiS2 by coupling with ferrous phosphite and phosphide
Source: Royal Society of Chemistry journal article supplement (doi:10.1039/d0se01837f), 2021-01-01
Supplement: d0se01837f1.pdf [file d0se01837f1.pdf]

## Support Information

# Enhanced oxygen evolution catalytic activity of NiS<sub>2</sub> by coupling with ferrous phosphite and phosphide

*Jie Yu,<sup>ab</sup> Tao Zhang,<sup>a</sup> Changchang Xing,<sup>ab</sup> Xuejiao Li,<sup>ab</sup> Xinyang Li,<sup>a</sup> Bo Wu<sup>c</sup> and Yue Li<sup>\*a</sup>*

<sup>a</sup> Key Laboratory of Materials Physics, Institute of Solid State Physics, HFIPS, Chinese Academy of Sciences, Hefei 230031, China

<sup>b</sup> University of Science and Technology of China, Hefei, 230026, P. R. China

<sup>c</sup> State Key Laboratory of Environment-friendly Energy Materials, Southwest University of Science and Technology, Mianyang, 621010, China

\*Email: [yueli@issp.ac.cn](mailto:yueli@issp.ac.cn)

## EXPERIMENTAL SECTION

*ECSA calculation:* The value of electrochemically active surface area (ECSA) of the electrocatalysts was calculated using the following equation:

$$\text{ECSA} = C_{\text{dl}} / C_s \times S$$

where  $C_{\text{dl}}$  was given by the slope of the linear relationship between capacitive currents ( $j$ ) and scan rate ( $v$ ) in non-Faradaic region ( $C_{\text{dl}} = j / v$ ),  $C_s$  is a general surface specific capacitance (0.040 mF cm<sup>2</sup> in 1 M KOH solution)<sup>1</sup>,  $S$  is the geometric surface area of work electrode (1 cm<sup>2</sup> in this work).

*TOF calculation:* The value of turnover frequency (TOF) of the electrocatalysts was calculated using the follow equation:

$$\text{TOF} = (J \times A) / (4 \times F \times n)$$

where  $J$  is the current density at a given overpotential,  $A$  is the geometric surface area of work electrode (1 cm<sup>2</sup> in this work),  $F$  is the Faradic constant (96485 C mol<sup>-1</sup>) and  $n$  is the number of moles of all metals (Ni and Fe in this work) in the electrode given by ICP.

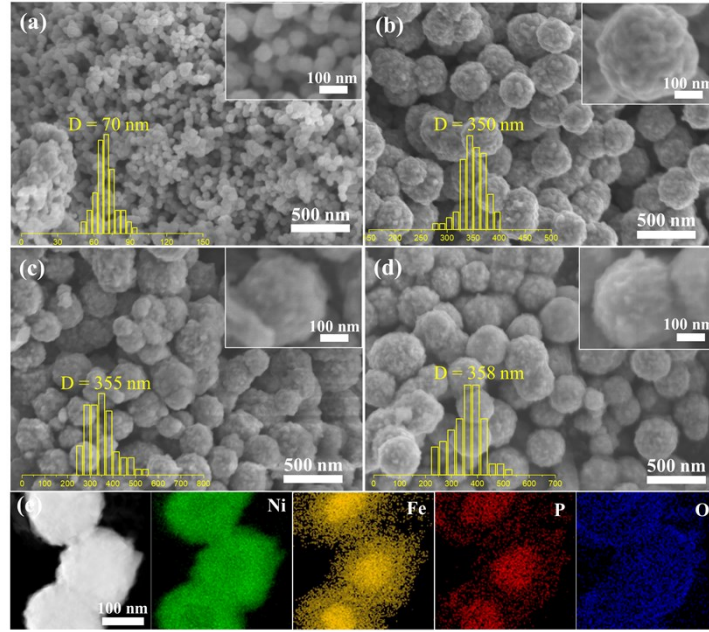

**Figure S1.** SEM images and particle size distribution of (a) Ni, (b) Ni/Fe<sub>0.2</sub>-HPO, (c) Ni/Fe<sub>0.8</sub>-HPO and (d) Ni/Fe<sub>1.0</sub>-HPO; (e) Energy-dispersive X-ray spectroscopy elemental mapping of Ni/Fe<sub>0.4</sub>-HPO.

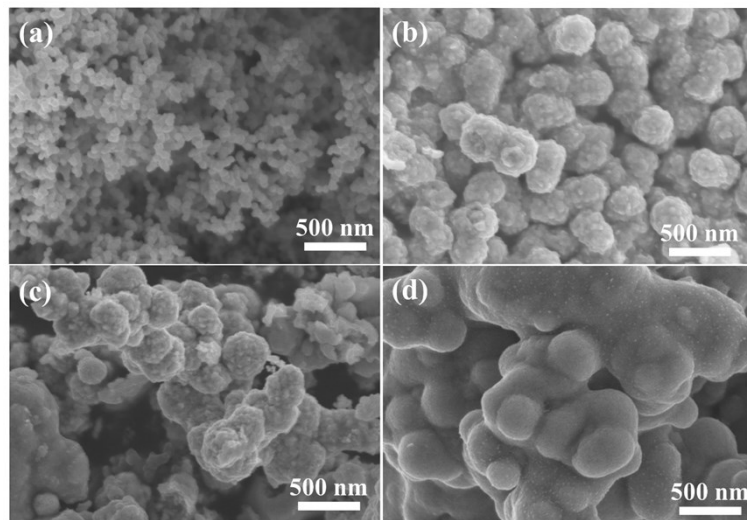

**Figure S2.** SEM images of (a) NiS<sub>2</sub>, (b) NiS<sub>2</sub>/Fe<sub>0.2</sub>-P, (c) NiS<sub>2</sub>/Fe<sub>0.8</sub>-P and (d) NiS<sub>2</sub>/Fe<sub>1.0</sub>-P.

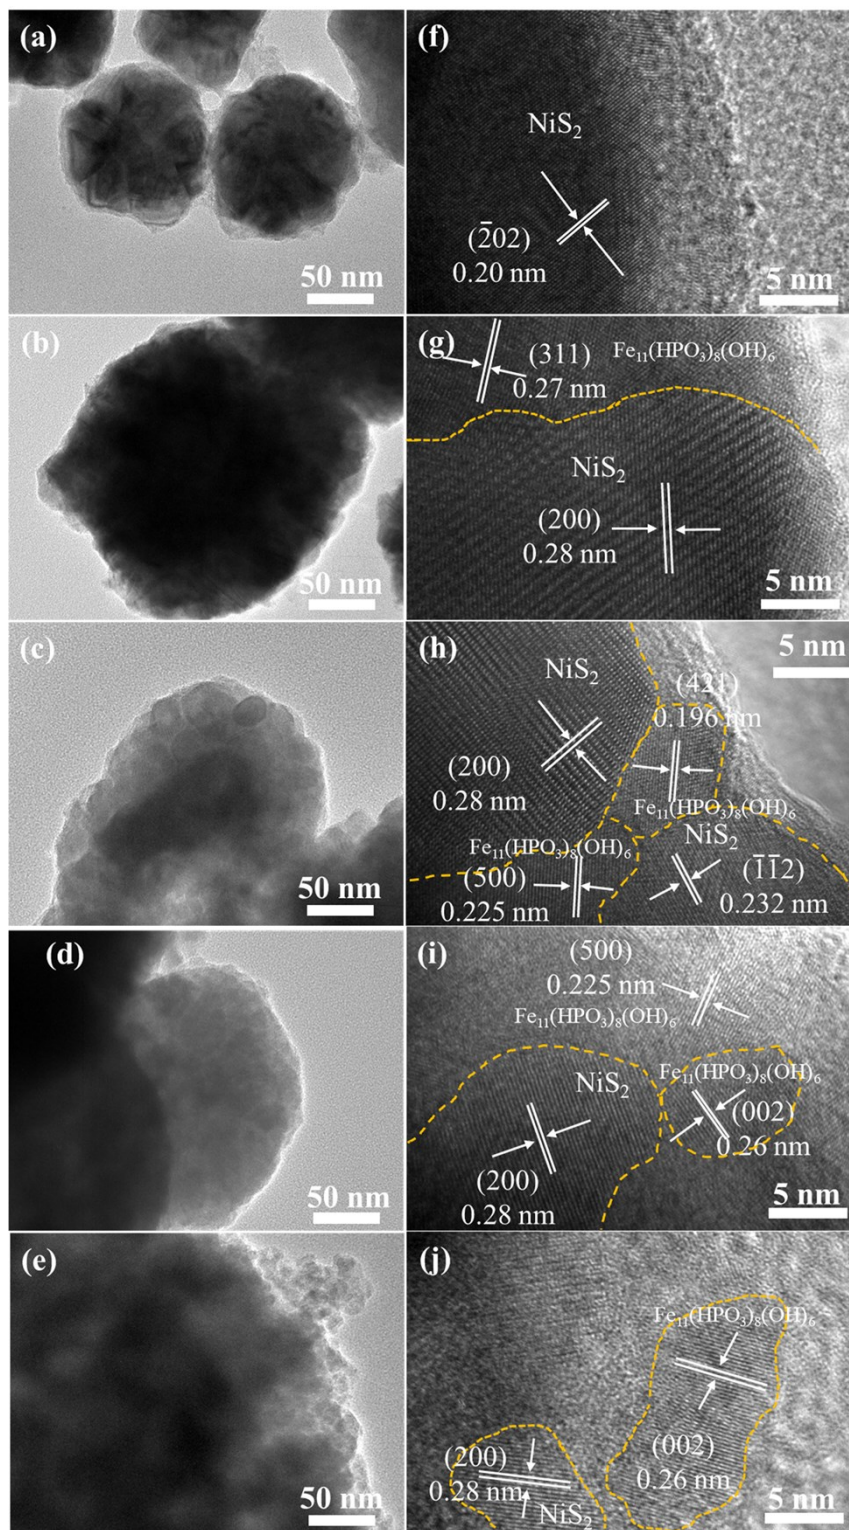

**Figure S3.** The TEM and HRTEM images of (a, f) pure  $\text{NiS}_2$ ; (b, g)  $\text{NiS}_2/\text{Fe}_{0.2}\text{-P}$ ; (c, h)  $\text{NiS}_2/\text{Fe}_{0.4}\text{-P}$ ; (d, i)  $\text{NiS}_2/\text{Fe}_{0.8}\text{-P}$  and (e, j)  $\text{NiS}_2/\text{Fe}_{1.0}\text{-P}$ .

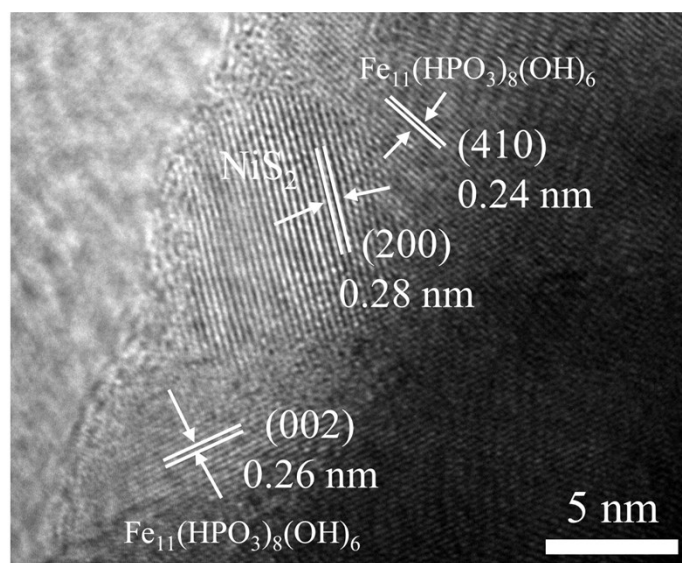

**Figure S4.** The another HRTEM image of NiS<sub>2</sub>/Fe<sub>0.4</sub>-P.

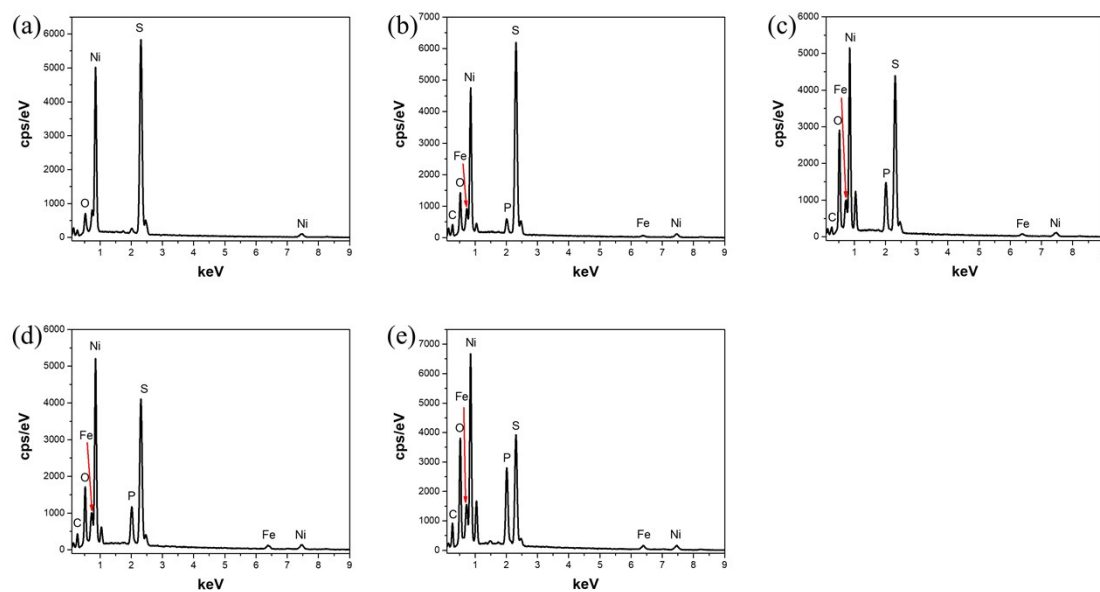

**Figure S5.** EDS spectra of (a) NiS<sub>2</sub>, (b) NiS<sub>2</sub>/Fe<sub>0.2</sub>-P, (c) NiS<sub>2</sub>/Fe<sub>0.4</sub>-P, (d) NiS<sub>2</sub>/Fe<sub>0.8</sub>-P and NiS<sub>2</sub>/Fe<sub>1.0</sub>-P.

**Table S1.** ICP-MS of Ni, Fe, S and P elements from NiS<sub>2</sub>/Fe-P (Fe<sub>0.2</sub>, Fe<sub>0.4</sub>, Fe<sub>0.8</sub> and Fe<sub>1.0</sub>), Ni and S elements from pure NiS<sub>2</sub>.

| Sample                                  | Element | Content ( $\mu\text{g/mL}$ ) | Atom% |
|-----------------------------------------|---------|------------------------------|-------|
| $\text{NiS}_2$                          | Ni      | 14.42                        | 34.5  |
|                                         | S       | 14.96                        | 65.5  |
| $\text{NiS}_2/\text{Fe}_{0.2}\text{-P}$ | Ni      | 13.98                        | 30.7  |
|                                         | Fe      | 1.39                         | 3.2   |
|                                         | S       | 14.87                        | 59.9  |
|                                         | P       | 1.48                         | 6.2   |
| $\text{NiS}_2/\text{Fe}_{0.4}\text{-P}$ | Ni      | 12.23                        | 29.2  |
|                                         | Fe      | 2.089                        | 5.3   |
|                                         | S       | 12.84                        | 56.1  |
|                                         | P       | 2.08                         | 9.4   |
| $\text{NiS}_2/\text{Fe}_{0.8}\text{-P}$ | Ni      | 11.80                        | 24.1  |
|                                         | Fe      | 4.49                         | 9.7   |
|                                         | S       | 12.62                        | 47.2  |
|                                         | P       | 4.91                         | 19.0  |
| $\text{NiS}_2/\text{Fe}_{1.0}\text{-P}$ | Ni      | 10.64                        | 23.0  |
|                                         | Fe      | 5.02                         | 11.4  |
|                                         | S       | 11.55                        | 45.7  |
|                                         | P       | 4.87                         | 19.9  |

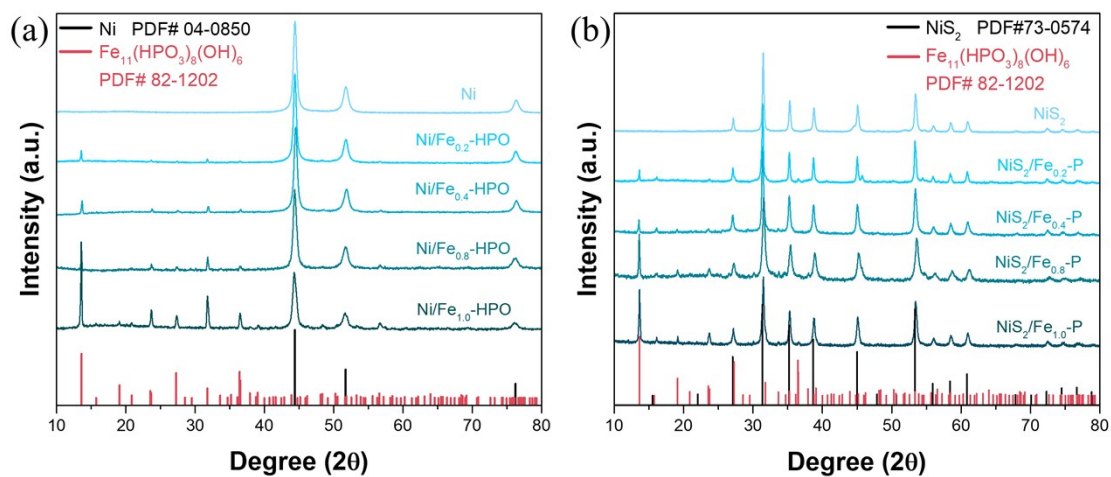

**Figure S6.** XRD patterns of (a) Ni and all Ni/Fe-HPO; (b)  $\text{NiS}_2$  and all  $\text{NiS}_2/\text{Fe-P}$ .

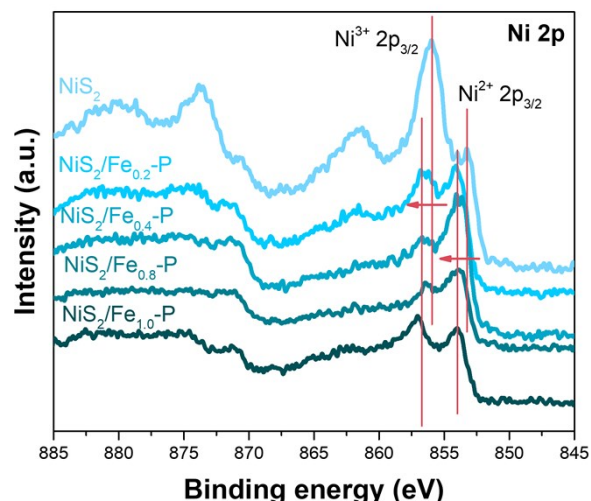

**Figure S7.** Ni 2p spectra for pure NiS<sub>2</sub> and all NiS<sub>2</sub>/Fe-P.

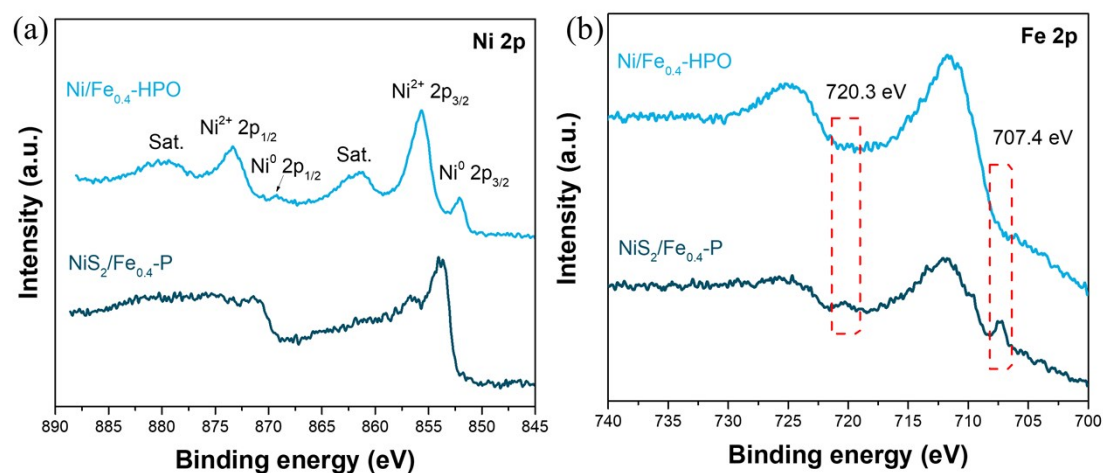

**Figure S8.** (a) Ni 2p and (b) Fe 2p XPS spectra for Ni/Fe<sub>0.4</sub>-HPO and NiS<sub>2</sub>/Fe<sub>0.4</sub>-P.

In the Ni 2p spectrum of Ni/Fe<sub>0.4</sub>-HPO, two peaks located at the binding energy of 852 and 869.6 eV are assigned to the 2p<sub>3/2</sub> and 2p<sub>1/2</sub> of Ni<sup>0</sup>. After sulfidation process, the peaks for Ni<sup>0</sup> disappear in the Ni 2p spectrum of NiS<sub>2</sub>/Fe<sub>0.4</sub>-P, indicating that the Ni<sup>0</sup> was all transformed to NiS<sub>2</sub>. As for Fe 2p spectra, NiS<sub>2</sub>/Fe<sub>0.4</sub>-P shows two new peaks at 707.4 and 720.3 eV, which can be ascribed to Fe-P species. It prove that part of Fe<sub>11</sub>(HPO<sub>3</sub>)<sub>8</sub>(OH)<sub>6</sub> was converted to iron phosphide species during the sulfidation process.

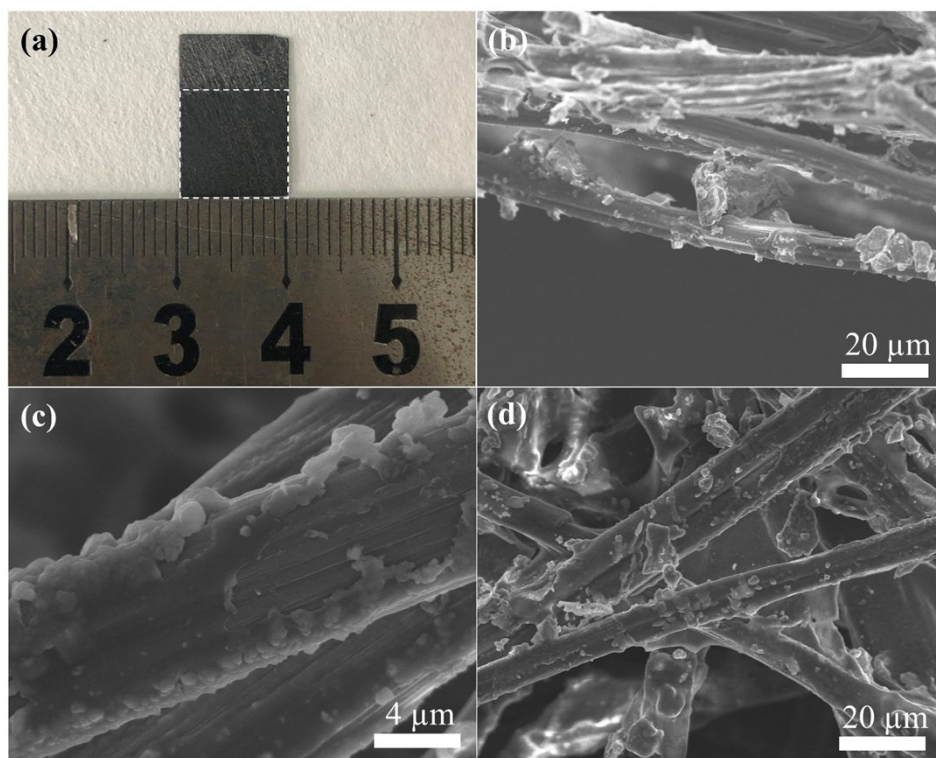

**Figure S9.** The optical photo (a) and the SEM images of side (b) and top (c,d) surface of the carbon paper with  $\text{NiS}_2/\text{Fe}_{0.4}\text{-P}$  electrocatalysts loading of  $\sim 0.98 \text{ mg}\cdot\text{cm}^{-2}$  used as work electrode.

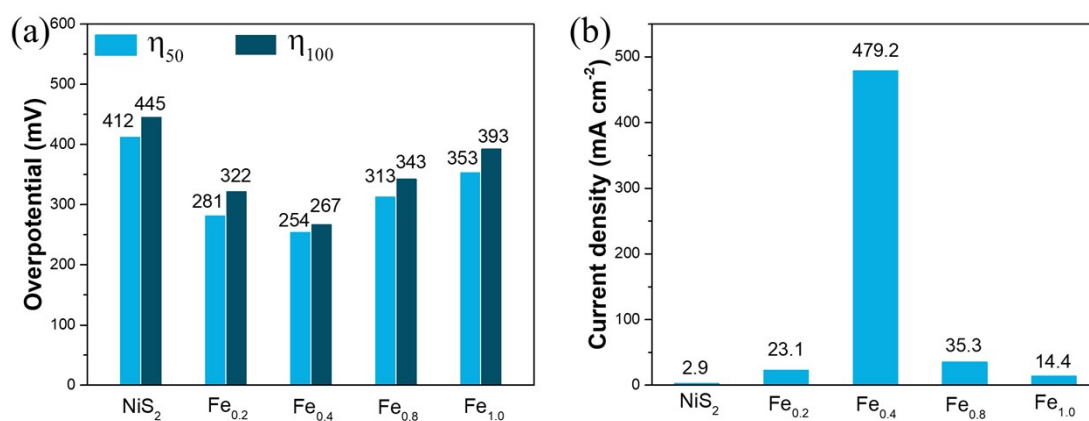

**Figure S10.** Histogram analysis of (a) overpotential at the current density of 50 and 100  $\text{mA}\cdot\text{cm}^{-2}$ , (b) current density at the overpotential of 300 mV.



**Table S2.** Calculation of Faradic efficiency.

| Catalyst                                  | $j/\text{mA}\cdot\text{cm}^{-2}$ | $t/\text{hours}$ | $V_{\text{O}_2}/\text{mL}$ | $FE/\%$ |
|-------------------------------------------|----------------------------------|------------------|----------------------------|---------|
| <b>NiS<sub>2</sub>/Fe<sub>0.4</sub>-P</b> | 100                              | 2                | 40.75                      | 97.5    |

The Faradic efficiency (FE) of NiS<sub>2</sub>/Fe<sub>0.4</sub>-P in 1 M KOH towards OER was calculated as the ratio of experimental and theoretical values of oxygen production, and illustrated as follows:

$$FE = \frac{4 \times F \times n_{\text{O}_2}}{I \times t} \times 100\%$$

$F$  is the Faraday constant ( $96485.33289 \text{ C}\cdot\text{mol}^{-1}$ ),  $n_{\text{O}_2}$  is the amount of experimentally generated O<sub>2</sub> gas,  $I$  is the constant current applied and  $t$  is the reaction time.

Here, the quantity of the experimentally generated O<sub>2</sub> gas was measured by the conventional water-gas displacement method at a constant current density of 100 mA·cm<sup>-2</sup> for 2 hours using a 1 cm<sup>2</sup> carbon paper electrode, and the volume of O<sub>2</sub> gas collected in this work is 40.75 mL. The theoretically generated O<sub>2</sub> gas was expected from the charge transfer.

**Table S3.** Comparison of OER performance for NiS<sub>2</sub>/Fe<sub>0.4</sub>-P catalyst with previously reported non-noble metal-based electrocatalysts in alkaline media.

| Electrocatalyst                                    | Substrate    | Overpotential ( $\eta_{10}$ , mV) | Overpotential ( $\eta_{100}$ , mV) | Tafel slope (mV·dec <sup>-1</sup> ) | Ref.             |
|----------------------------------------------------|--------------|-----------------------------------|------------------------------------|-------------------------------------|------------------|
| NiS <sub>2</sub> /Fe <sub>0.4</sub> -P nanospheres | Carbon paper | 218                               | 268                                | 47.5                                | <b>This work</b> |

|                                                                                                                                                                  |                       |     |      |      |                                                                    |
|------------------------------------------------------------------------------------------------------------------------------------------------------------------|-----------------------|-----|------|------|--------------------------------------------------------------------|
| MoS <sub>2</sub> /NiS <sub>2</sub><br>nanosheets                                                                                                                 | Carbon<br>cloth       | 278 | 393  | 91.7 | <i>Adv. Sci.</i> <b>2019</b> ,<br>6, 1900246                       |
| N-NiMoO <sub>4</sub> /NiS <sub>2</sub><br>nanowires/nanosheets                                                                                                   | Carbon<br>cloth       | 267 | 335  | 44.3 | <i>Adv. Funct.<br/>Mater.</i> <b>2019</b> ,<br>29, 1805298         |
| MoS <sub>2</sub> -Ni <sub>3</sub> S <sub>2</sub><br>heteronanorods                                                                                               | Nickle<br>foam        | 249 | ~340 | 57   | <i>ACS Catal.</i><br><b>2017</b> , 7, 2357                         |
| NiTe/NiS<br>Nanoarrays/nanodots                                                                                                                                  | Nickle<br>foam        | 209 | 257  | 49   | <i>Adv. Mater.</i><br><b>2019</b> , 31,<br>1900430                 |
| Fe <sub>2</sub> O <sub>3</sub> @Ni <sub>2</sub> P/Ni(PO <sub>3</sub> ) <sub>2</sub><br>nanoparticles                                                             | Nickle<br>foam        | \   | 300  | 48.2 | <i>J. Mater.<br/>Chem. A</i> <b>2019</b> ,<br>7, 965               |
| NiFe-LDH<br>nanosheets                                                                                                                                           | Glass<br>carbon       | 310 | \    | 74   | <i>ACS<br/>Sustainable<br/>Chem. Eng.</i><br><b>2019</b> , 7, 4247 |
| Ni <sub>3</sub> S <sub>2</sub> @MoS <sub>2</sub> /FeOOH<br>nanosheets                                                                                            | Carbon<br>cloth       | 234 | 282  | 49   | <i>Appl. Catal. B</i><br><b>2019</b> , 244,<br>1004                |
| Fe-Ni@NC-CNTs                                                                                                                                                    | Glassy<br>carbon dish | 274 | \    | 45.5 | <i>Angew. Chem.</i><br><b>2018</b> , 130,<br>9059                  |
| Ni <sub>11</sub> (HPO <sub>3</sub> ) <sub>8</sub> (OH) <sub>6</sub> /NF                                                                                          | Nickle<br>foam        | 232 | 362  | \    | <i>Energy<br/>Environ. Sci.</i><br><b>2018</b> , 11, 1287          |
| Fe <sub>11.7%</sub> -<br>Co <sub>11</sub> (HPO <sub>3</sub> ) <sub>8</sub> (OH) <sub>6</sub>                                                                     | Nickle<br>foam        | 206 | \    | 47   | <i>Electrochimica<br/>Acta</i> <b>2020</b> ,<br>334, 135616        |
| Co <sub>11</sub> (HPO <sub>3</sub> ) <sub>8</sub> (OH) <sub>6</sub> /C<br>o <sub>11</sub> (PO <sub>3</sub> ) <sub>8</sub> O <sub>6</sub> core-shell<br>nanowires | Glassy<br>carbon      | 340 | \    | 60   | <i>Appl. Catal. B-<br/>Environ.</i> <b>2019</b> ,<br>259, 118091   |
| hierarchical Ni-Fe<br>LDH                                                                                                                                        | Glassy<br>carbon      | 280 | \    | 49.4 | <i>Angew. Chem.<br/>Int. Ed.</i> <b>2018</b> ,<br>57, 172          |
| (Ni-Fe) <sub>S<sub>y</sub></sub> /NiFe(OH) <sub>y</sub><br>films                                                                                                 | Nickle<br>foam        | \   | 290  | 58   | <i>Appl. Catal. B-<br/>Environ.</i> <b>2019</b> ,                  |

|                                                                                               |                |     |     |      |                                                    |
|-----------------------------------------------------------------------------------------------|----------------|-----|-----|------|----------------------------------------------------|
|                                                                                               |                |     |     |      | 246, 337                                           |
| 3D<br>Fe <sub>2</sub> O <sub>3</sub> @Ni <sub>2</sub> P/Ni(PO <sub>3</sub> ) <sub>2</sub> /NF | Nickle<br>foam | \   | 300 | 48.2 | <i>J. Mater. Chem. A</i> ,<br><b>2019</b> , 7, 965 |
| Fe-Ni <sub>3</sub> S <sub>2</sub> /NF                                                         | Nickle<br>foam | 214 | 249 | 42   | <i>ACS Catal.</i><br><b>2018</b> , 8, 5431         |

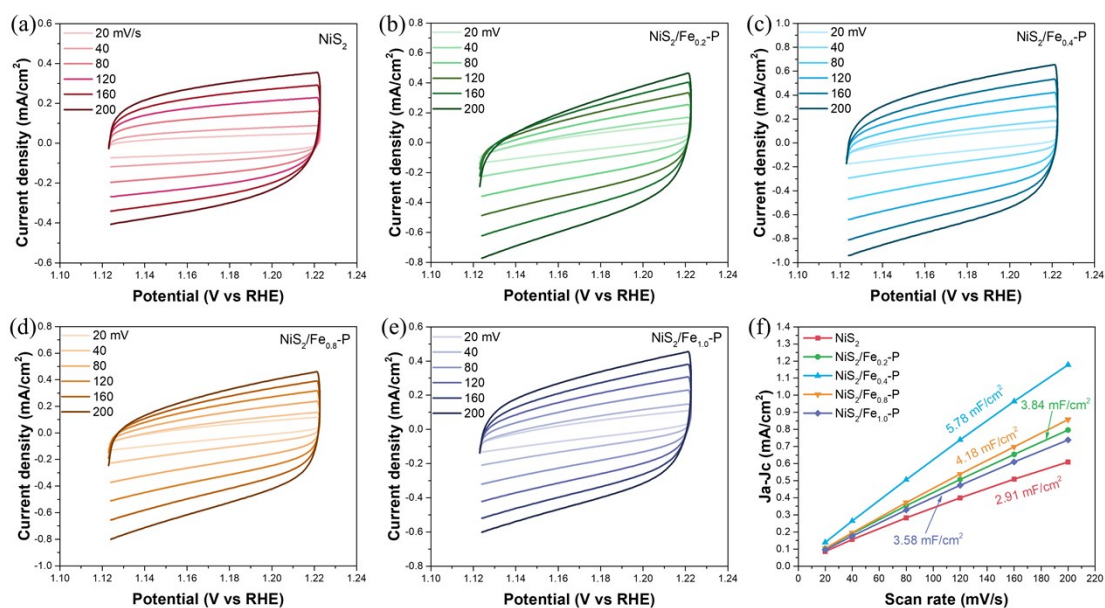

**Figure S11.** Cyclic voltammogram (CV) curves of (a) NiS<sub>2</sub>, (b) NiS<sub>2</sub>/Fe<sub>0.2</sub>-P, (c) NiS<sub>2</sub>/Fe<sub>0.4</sub>-P, (d) NiS<sub>2</sub>/Fe<sub>0.8</sub>-P and (e) NiS<sub>2</sub>/Fe<sub>1.0</sub>-P at different scan rates of 20, 40, 80, 120, 160 and 200 mV s<sup>-1</sup>. (f) The corresponding C<sub>dl</sub> values of the catalysts.

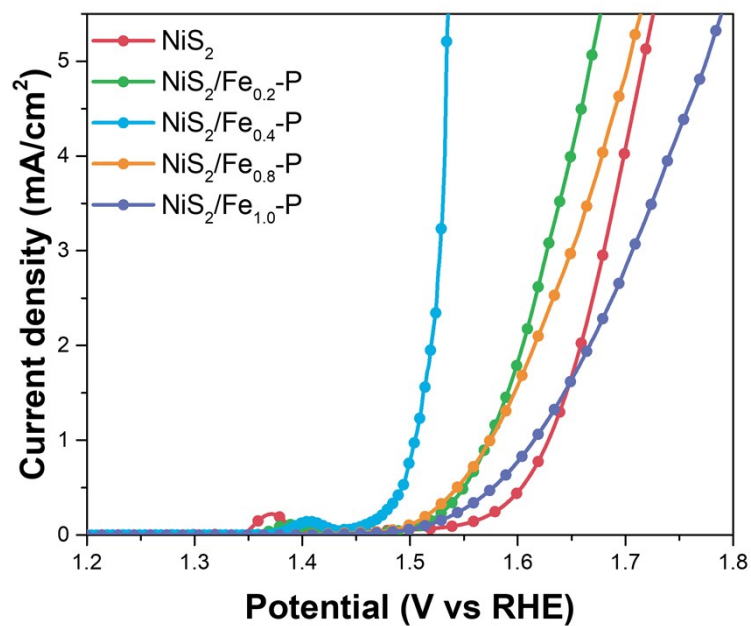

**Figure S12.** The normalized LSV curves of pure NiS<sub>2</sub> and all NiS<sub>2</sub>/Fe-P catalysts.

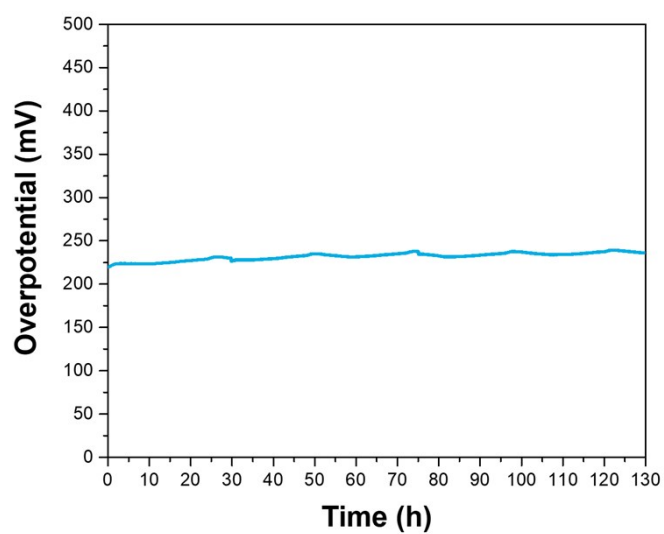

**Figure S13.** The chronopotentiometry plot of NiS<sub>2</sub>/Fe<sub>0.4</sub>-P catalyst for 130 h at the current density of 10 mA·cm<sup>-2</sup>.

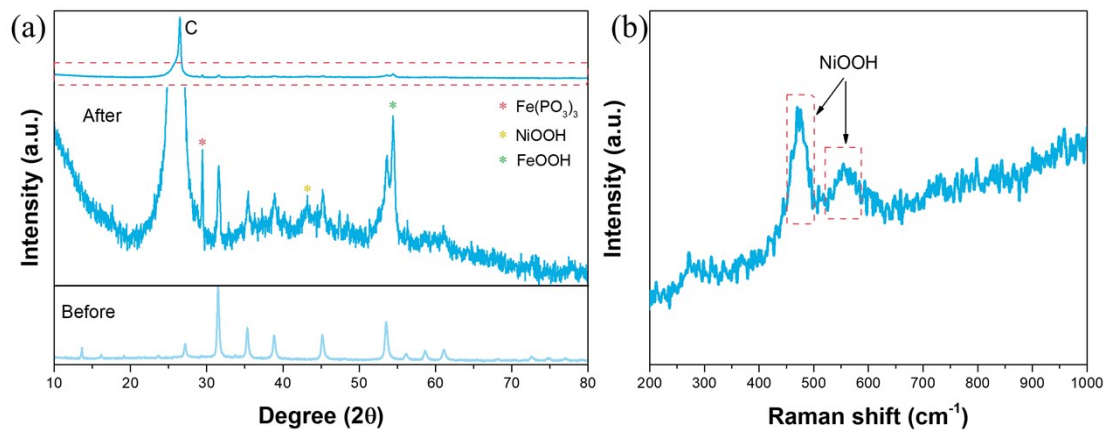

**Figure S14.** (a) The XRD patterns of NiS<sub>2</sub>/Fe<sub>0.4</sub>-P catalyst before and after long-term OER test; (b) The Raman spectrum of NiS<sub>2</sub>/Fe<sub>0.4</sub>-P catalyst after long-term OER test.

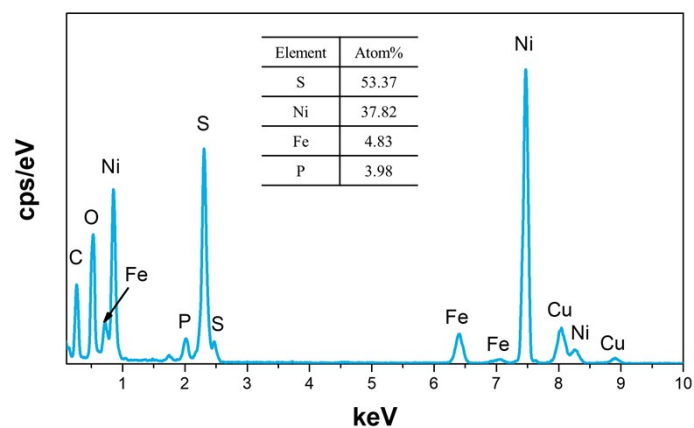

**Figure S15.** EDS spectrum of NiS<sub>2</sub>/Fe<sub>0.4</sub>-P catalyst after long-term OER test.

**Table S4.** ICP-MS of Ni, Fe, S and P elements from NiS<sub>2</sub>/Fe<sub>0.4</sub>-P catalyst after long-term OER test.

| Element | Content (μg/mL) | Atom% |
|---------|-----------------|-------|
| Ni      | 10.78           | 35.76 |
| Fe      | 1.296           | 4.52  |
| S       | 9.137           | 55.48 |
| P       | 0.674           | 4.24  |

## REFERENCES

- (1) McCrory, C.; Jung, S.; Ferrer, I. M.; Chatman, S. M.; Peters, J. C.; Jaramillo, T. F. Benchmarking Hydrogen Evolving Reaction and Oxygen Evolving Reaction Electrocatalysts for Solar Water Splitting Devices. *J. Am. Chem. Soc.* **2015**, *137*, 4347-4357.
